# Supplementary material for: Identifying DUSP-1 and FOSB as hub genes in immunoglobulin A nephropathy by WGCNA and DEG screening and validation
Source: PeerJ. 2022 Jul 25;10:e13725. doi: 10.7717/peerj.13725 (PMC9332322; doi:10.7717/peerj.13725)
Supplement: Supplemental Information 1 [file peerj-10-13725-s001.xlsx]

## Sheet: Sheet1
Control	IgAN
10.6	1.2
11.4	0.8
13.5	1
